# Supplementary material for: Overexpression of bHLH95, a basic helix–loop–helix transcription factor family member, impacts trichome formation via regulating gibberellin biosynthesis in tomato
Source: PubMed Central journal article supplement (PMC7475245; doi:10.1093/jxb/eraa114), 2020-03-05
Supplement: eraa114_suppl_supplementary_table_s1_s3.pdf [file eraa114_suppl_supplementary_table_s1_s3.pdf]

**Table S1.** Genes specifically replaced by *S.pennellii* genome located in IL10-2

| <b>Gene</b>           | <b>Gene description</b>                                                                                                                                                                        |
|-----------------------|------------------------------------------------------------------------------------------------------------------------------------------------------------------------------------------------|
| Solyc10g078940        | Receptor-like kinase (AHRD V1 ***- A7VM24_MARPO); contains Interpro domain(s) IPR002290 Serine/threonine protein kinase                                                                        |
| Solyc10g078950        | Glucose-repressible alcohol dehydrogenase transcriptional effector CCR4 (AHRD V1 **-- D3TNH5_GLOMM); contains Interpro domain(s) IPR005135 Endonuclease/exonuclease/phosphatase                |
| Solyc10g078960        | 60S ribosomal protein L21-like protein (AHRD V1 ***- Q3HVK5_SOLTU); contains Interpro domain(s) IPR001147 Ribosomal protein L21e                                                               |
| Solyc10g078970        | Zinc finger protein (AHRD V1 *-*- B6SZ06_MAIZE); contains Interpro domain(s) IPR007087 Zinc finger, C2H2-type                                                                                  |
| Solyc10g078980        | Unknown Protein (AHRD V1)                                                                                                                                                                      |
| Solyc10g078990        | Zinc finger-like protein (AHRD V1 ***- Q9M2P1_ARATH); contains Interpro domain(s) IPR007087 Zinc finger, C2H2-type                                                                             |
| Solyc10g079000        | Transmembrane and coiled-coil domain-containing protein 1 (AHRD V1 ***- B0WCQ4_CULQU); contains Interpro domain(s) IPR008559 Protein of unknown function DUF841, eukaryotic                    |
| Solyc10g079010        | Unknown Protein (AHRD V1)                                                                                                                                                                      |
| Solyc10g079020        | Cc-nbs-lrr resistance protein (AHRD V1 ***- B9NCL4_POPTR)                                                                                                                                      |
| Solyc10g079030        | Ras-related protein Rab-25 (AHRD V1 ***- RAB25_RABIT); contains Interpro domain(s) IPR015595 Rab11-related                                                                                     |
| Solyc10g079040        | Squalene synthase (AHRD V1 ***- O22107_SOYBN); contains Interpro domain(s) IPR006449 Farnesyl-diphosphate farnesyltransferase                                                                  |
| <b>Solyc10g079050</b> | <b>BHLH transcription factor (AHRD V1 *-*- B6TXR4_MAIZE); contains Interpro domain(s) IPR011598 Helix-loop-helix DNA-binding</b>                                                               |
| Solyc10g079060        | Squalene synthase (AHRD V1 ***- Q9XF02_CAPAN); contains Interpro domain(s) IPR006449 Farnesyl-diphosphate farnesyltransferase                                                                  |
| <b>Solyc10g079070</b> | <b>Transcription factor (AHRD V1 *-*- D6MKM4_9ASPA); contains Interpro domain(s) IPR011598 Helix-loop-helix DNA-binding</b>                                                                    |
| Solyc10g079080        | Zinc finger A20 and AN1 domain-containing stress-associated protein 6 (AHRD V1 *-*- C1BNQ4_9MAXI); contains Interpro domain(s) IPR002653 Zinc finger, A20-type IPR000058 Zinc finger, AN1-type |
| Solyc10g079090        | Chaperone protein dnaJ 6 (AHRD V1 ***- B6TT74_MAIZE); contains Interpro domain(s) IPR003095 Heat shock protein DnaJ                                                                            |
| Solyc10g079100        | Unknown Protein (AHRD V1)                                                                                                                                                                      |
| Solyc10g079110        | 1-acyl-sn-glycerol-3-phosphate acyltransferase (AHRD V1 ***- Q2Z1Y8_PRUMU); contains Interpro domain(s) IPR002123 Phospholipid/glycerol acyltransferase                                        |
| Solyc10g079120        | Zinc finger CCCH domain-containing protein 30 (AHRD V1 **-- C3H30_ARATH); contains Interpro domain(s) IPR002110 Ankyrin                                                                        |
| Solyc10g079130        | Calcium-dependent protein kinase 4 (AHRD V1 ***- Q5EDD1_CAPAN); contains Interpro domain(s) IPR002290 Serine/threonine protein kinase                                                          |
| Solyc10g079140        | Guanylate kinase (AHRD V1 ***- Q9FVC6_TOBAC); contains Interpro domain(s) IPR017665 Guanylate kinase, sub-group                                                                                |
| Solyc10g079150        | Nuclear transcription factor Y subunit A-1 (AHRD V1 *-*- B6TAR1_MAIZE); contains Interpro domain(s) IPR001289 CCAAT-binding transcription factor, subunit B                                    |
| Solyc10g079160        | Os01g0617600 protein (Fragment) (AHRD V1 ***- Q0JL81_ORYSJ); contains Interpro domain(s) IPR001578 Peptidase C12, ubiquitin carboxyl-terminal hydrolase 1                                      |
| Solyc10g079170        | Receptor like kinase, RLK                                                                                                                                                                      |
| Solyc10g079180        | Unknown Protein (AHRD V1); contains Interpro domain(s) IPR001932 Protein phosphatase 2C-related                                                                                                |
| Solyc10g079190        | Pre-mRNA splicing factor (AHRD V1 *-*- C4QX20_PICPG); contains Interpro domain(s) IPR000504 RNA recognition motif, RNP-1                                                                       |

Solyc10g079200 Mitochondrial carrier protein (AHRD V1 \*\*\*- B1N662\_SOLLC); contains Interpro domain(s) IPR018108 Mitochondrial substrate/solute carrier IPR001993 Mitochondrial substrate carrier

Solyc10g079210 Abscisic acid insensitive 8 homologue (AHRD V1 \*\*\*- A5A6Q2\_WHEAT)

Solyc10g079220 Unknown Protein (AHRD V1); contains Interpro domain(s) IPR003441 No apical meristem (NAM) protein

Solyc10g079230 CM0545.450.nc protein (AHRD V1 \*\*\*- B0BLB7\_LOTJA); contains Interpro domain(s) IPR004158 Protein of unknown function DUF247, plant

Solyc10g079240 Calmodulin binding protein (AHRD V1 \*\*\*- B6T589\_MAIZE); contains Interpro domain(s) IPR000048 IQ calmodulin-binding region

Solyc10g079250 Protein recA (AHRD V1 \*\*\*- Q0F3T6\_9PROT); contains Interpro domain(s) IPR013765 RecA IPR003593 ATPase, AAA+ type, core

Solyc10g079260 Os06g0301100 protein (Fragment) (AHRD V1 \*- \*- Q0DCQ4\_ORYSJ); contains Interpro domain(s) IPR005349 Uncharacterised protein family UPF0136, Transmembrane

Solyc10g079270 Carbonic anhydrase family protein (AHRD V1 \*\*\*- D7MFG3\_ARALY); contains Interpro domain(s) IPR018340 Carbonic anhydrase, CAH1-like

Solyc10g079280 Organic anion transporter (AHRD V1 \*- \*- D7L9W2\_ARALY); contains Interpro domain(s) IPR004853 Protein of unknown function DUF250

Solyc10g079290 Outer envelope membrane protein (AHRD V1 \*\*\*- Q31PR1\_SYNE7); contains Interpro domain(s) IPR000184 Bacterial surface antigen (D15)

Solyc10g079300 Calcium-transporting ATPase 1 (AHRD V1 \*\*\*- Q7XBH9\_CERRI); contains Interpro domain(s) IPR006408 ATPase, P-type, calcium-transporting, PMCA-type

Solyc10g079310 tRNA-splicing endonuclease subunit sen54 (AHRD V1 \*- \*- B6JWH8\_SCHJY)

Solyc10g079320 Glucosyltransferase-5 (AHRD V1 \*- \*- Q8S9A4\_PHAAN); contains Interpro domain(s) IPR002213 UDP-glucuronosyl/UDP-glucosyltransferase

Solyc10g079330 UDP-glucosyltransferase HvUGT5876 (AHRD V1 \*- \*- D3WYW1\_HORVD); contains Interpro domain(s) IPR002213 UDP-glucuronosyl/UDP-glucosyltransferase

Solyc10g079340 UDP-glucosyltransferase (AHRD V1 \*- \*- B8QI32\_9MAGN); contains Interpro domain(s) IPR002213 UDP-glucuronosyl/UDP-glucosyltransferase

Solyc10g079350 UDP-glucosyltransferase HvUGT5876 (AHRD V1 \*\*\*- D3WYW1\_HORVD); contains Interpro domain(s) IPR002213 UDP-glucuronosyl/UDP-glucosyltransferase

Solyc10g079360 Transcription initiation factor IIB-2 (AHRD V1 \*\*\*- D7L8X6\_ARALY); contains Interpro domain(s) IPR000812 Transcription factor TFIIB related

Solyc10g079370 Transcription initiation factor IIB-2 (AHRD V1 \*\*\*- D7L8X6\_ARALY); contains Interpro domain(s) IPR000812 Transcription factor TFIIB related

Solyc10g079380 Heat stress transcription factor (AHRD V1 \*\*\*- D4QAU8\_CARPA); contains Interpro domain(s) IPR000232 Heat shock factor (HSF)-type, DNA-binding

Solyc10g079390 Unknown Protein (AHRD V1)

Solyc10g079400 Gelsolin (Fragment) (AHRD V1 \*\*\*- C0PU67\_SALSA); contains Interpro domain(s) IPR007122 Gelsolin

Solyc10g079410 Patatin-like phospholipase domain-containing protein c (AHRD V1 \*\*\*- B6K1H8\_SCHJY); contains Interpro domain(s) IPR006689 ARF/SAR superfamily

Solyc10g079420 Calmodulin (AHRD V1 \*\*\*- B6TKX0\_MAIZE); contains Interpro domain(s) IPR011992 EF-Hand type

Solyc10g079430 U3 small nucleolar RNA-associated protein 11 (AHRD V1 \*\*\*- B6TNQ8\_MAIZE); contains Interpro domain(s) IPR007144 Small-subunit processome, Utp11

Solyc10g079440 FAD-dependent oxidoreductase family protein (AHRD V1 \*\*\*- D7LVK2\_ARALY); contains Interpro domain(s) IPR006076 FAD dependent oxidoreductase

Solyc10g081860 Unknown Protein (AHRD V1)

Solyc10g081870 Digalactosyldiacylglycerol synthase (Fragment) (AHRD V1 \*\*\*- Q6DQ98\_TOBAC)

Solyc10g081880 Pentatricopeptide repeat-containing protein (AHRD V1 \*\*\*- D7MTZ6\_ARALY); contains Interpro domain(s) IPR002885 Pentatricopeptide repeat

Solyc10g081890 Aluminum-activated malate transporter (Fragment) (AHRD V1 \*\*\*- Q07DP9\_AEGSP); contains Interpro domain(s) IPR006214 Uncharacterised protein family UPF0005

**Table S2.** Putative bHLH binding *cis*-elements present in the promoter regions of *SIGA20ox2*, *SIKS5*. The genomic sequence corresponding to 3.0 kb upstream of the predicted translation start codon (ATG) was analyzed for the presence of known *cis*-acting elements.

| Gene                         | Motif      | Position | Sequence |
|------------------------------|------------|----------|----------|
| <b>GA biosynthesis genes</b> |            |          |          |
| <i>SIGA20ox2</i>             | E-box      | -2976    | CAATTG   |
|                              | E-box      | -2842    | CAAGTG   |
|                              | E-box-like | -2823    | CAATAG   |
|                              | E-box      | -2796    | CAATTG   |
|                              | E-box-like | -2771    | CTCTTG   |
|                              | E-box-like | -2755    | CAAACG   |
|                              | E-box-like | -2689    | CTATTG   |
|                              | E-box-like | -2658    | CTATTG   |
|                              | E-box-like | -2641    | CCATTG   |
|                              | E-box-like | -2627    | CTTTTG   |
|                              | E-box-like | -2436    | CAAAAG   |
|                              | E-box      | -2418    | CAATTG   |
|                              | E-box-like | -2111    | CTATTG   |
|                              | E-box-like | -1796    | CAAAGG   |
|                              | E-box-like | -1783    | CAAGAG   |
|                              | E-box-like | -1766    | CAATAG   |
|                              | E-box-like | -1735    | CAATAG   |
|                              | E-box-like | -1704    | CAATAG   |
|                              | E-box-like | -1457    | CACTCG   |
|                              | E-box-like | -1392    | CGTTTG   |
|                              | E-box-like | -1222    | CATCCG   |
|                              | E-box-like | -1017    | CTGGTG   |
|                              | E-box-like | -970     | CAAGAG   |
|                              | E-box-like | -935     | CAGTAG   |
|                              | E-box-like | -686     | CGTATG   |
|                              | E-box-like | -554     | CGAATG   |
|                              | E-box-like | -179     | CTCGTG   |
|                              | E-box-like | -156     | CATTGT   |
|                              | E-box-like | -112     | CTTATG   |
|                              | E-box-like | -74      | CCCTTG   |
| E-box-like                   | -46        | CTCCTG   |          |
| <i>SIKS5</i>                 | E-box      | -2789    | CATGTG   |
|                              | E-box-like | -2777    | CGTATG   |
|                              | E-box-like | -2671    | CAAGAG   |
|                              | E-box-like | -2641    | CTTATG   |
|                              | E-box-like | -2619    | CAATCG   |
|                              | E-box      | -2604    | CACATG   |
|                              | E-box-like | -2536    | CATTCTG  |
|                              | E-box-like | -2525    | CATACG   |
|                              | E-box-like | -2502    | CTTTTG   |
|                              | E-box-like | -2369    | CATTAG   |

|            |       |        |
|------------|-------|--------|
| E-box-like | -2190 | CATAAG |
| E-box-like | -2143 | CAAAAG |
| E-box-like | -2090 | CGCTTG |
| E-box-like | -1970 | CTTCTG |
| E-box      | -1891 | CATTTG |
| E-box      | -1883 | CAATTG |
| E-box      | -1772 | CAATTG |
| E-box      | -1744 | CAAATG |
| E-box-like | -1688 | CGAATG |
| E-box-like | -1451 | CAGTCG |
| E-box-like | -1444 | CGTGTG |
| E-box-like | -1325 | CGTTTG |
| E-box-like | -1075 | CAAACG |
| E-box-like | -907  | CGTTTG |
| E-box      | -812  | CAAATG |
| E-box-like | -737  | CAAACG |
| E-box-like | -642  | CTTATG |
| E-box-like | -551  | CAAAAG |
| E-box      | -539  | CAAATG |
| E-box      | -517  | CATATG |
| E-box-like | -493  | CCCATG |
| E-box-like | -461  | CATCGG |
| E-box-like | -397  | CATTAG |
| E-box-like | -301  | CACGGG |
| E-box-like | -253  | CAAGGG |
| E-box-like | -185  | CTCATG |
| E-box-like | -164  | CCTATG |
| E-box-like | -121  | CTAATG |
| E-box      | -104  | CACCTG |
| E-box-like | -101  | CTGATG |

**Table S3.** List of the primers used in the study.

| Gene Name            | Primer Sequence                       |
|----------------------|---------------------------------------|
| <i>SlbHLH95-OE</i>   | F 5'-TCTAGAATGGATTCATCAGAGTTTGAG-3'   |
|                      | R 5'-GAGCTCTCAATCTGGTTTCTGCATTG-3'    |
| <i>qRT-SlbHLH65</i>  | F 5'-CAGAAAGAGCAAGGAGAGAGAAG-3'       |
|                      | R 5'-GGGACTGTACATGGTTGATGAT-3'        |
| <i>qRT-SlbHLH95</i>  | F 5'-TTTGTACACACCCTAAGTTTACC-3'       |
|                      | R 5'-CGTGTTCTTCTCACCCTTTCTG-3'        |
| <i>qRT-SlActin</i>   | F 5'-TGTCCCTATTTACGAGGGTTATGC-3'      |
|                      | R 5'-CAGTTAAATCACGACCAGCAAGAT-3'      |
| <i>SlbHLH95-eGFP</i> | F 5'- TCTAGAATGGATTCATCAGAGTTTGAG-3'  |
|                      | R 5'- GCGGCCGCATCTGGTTTCTGCATTGCTG-3' |
| <i>qRT-SlWoolly</i>  | F 5'-AGGAATTGGGAAGAAGACTTGG-3'        |
|                      | R 5'-TCATGTTGAGCCTTCATCTGAG-3'        |

|                                |                                                                                                              |
|--------------------------------|--------------------------------------------------------------------------------------------------------------|
| <i>qRT-SlCycB2</i>             | F 5'-ATCTAGTGGGTGGTCAGGG-3'<br>R 5'-GCATATTTCCCTCGTGATGGGTC-3'                                               |
| <i>qRT-SIGASA4</i>             | F 5'-GCCAAGATTGTTTCAGTTCTCC-3'<br>R 5'-CATACTTCTTAGCATAGTGGTGG-3'                                            |
| <i>qRT-SIGAMYB2</i>            | F 5'-CTAGTGGGAAGCTCATCAGAGG-3'<br>R 5'-GGTCCGTAATCAAACCTTCTCCTG-3'                                           |
| <i>qRT-SIANT1</i>              | F 5'-TTGAGGTGGCTGAATTATCTAAGG-3'<br>R 5'-CAATAAGTGACCATCTGTTGCC-3'                                           |
| <i>qRT-SIKS5</i>               | F 5'-CATTACAAAGTTGCTCATGACC-3'<br>R 5'-CAATGTGTAGTTCATCTTCCCA-3'                                             |
| <i>qRT-SIGA20ox2</i>           | F 5'-TTCCATATTCTACCCTACAAG-3'<br>R 5'-TCATCGCATTACAATACTCTT-3'                                               |
| <i>SlbHLH95-Luciferase</i>     | F 5'-TCTAGAATGGATTCATCAGAGTTTGAG-3'<br>R 5'-GGATCCTCAATCTGGTTTCTGCATTG-3'                                    |
| <i>proSIGA20ox2-Luciferase</i> | F 5'-ACGCGTCGACTTCTTAACAAATCAAAGAAGA-3'<br>R 5'-GGATCCGAGTGGGTAACAAAATATTGGATTC-3'                           |
| <i>proSIKS5-Luciferase</i>     | F 5'-TCCCCGGGTTGTGGTATATACAAGCTTTGTA-3'<br>R 5'-CGCGGATCCTATATTGTGGAATATTCAAGGA-3'                           |
| <i>SlbHLH95-Y1H</i>            | F 5'-GCGCCGTCTCGCTCGAATGGATTCATCAGAGTTTGAGAAAAAC-3'<br>R 5'-GCGCCGTCTCGCTCAAAGCTCAATCTGGTTTCTGCATTGCTGAGC-3' |
| <i>proSIGA20ox2-Y1H (1 ×)</i>  | 5'-CATATATTTTCAAGAGAATATTTTTTTGCTTGTCACAAAATACGTCA<br>GTAGAAAAAATTGAG-3'                                     |
| <i>ΔproSIGA20ox2-Y1H (1 ×)</i> | 5'-CATATATTTTACAGGAAATATTTTTTTGCTTGTCACAAAATACGTA<br>CGTGAAAAAATTGAG-3'                                      |
| <i>proSIKS5-Y1H (1 ×)</i>      | 5'-ATGACGGTGTGTCAGACACCTGATGAATTTTAATGACGGTGTGTCAGACA<br>CCTGATGAATTTTAATGACGGTGTGTCAGACACCTGATGAATTTT-3'    |
| <i>ΔproSIKS5-Y1H (1 ×)</i>     | 5'-ATGACGGTGTGTCAGAACCCGTATGAATTTTAATGACGGTGTGTCAGAAC<br>CCGTATGAATTTTAATGACGGTGTGTCAGAACCCGTATGAATTTT-3'    |

---
